# Supplementary material for: Patterns of respiratory health services utilization from birth to 5 years of children who experienced adverse birth outcomes
Source: PubMed Central journal article supplement (PMC7895380; doi:10.1371/journal.pone.0247527), 2021-02-19
Supplement: pone.0247527.s004.pdf [file pone.0247527.s004.pdf]

**S1 Table.** Rate ratios for respiratory hospitalizations and ED visits from birth to five years for adverse birth groups.

| Adverse birth group | Outcome       | Hospitalizations RR [95% CI] |                          | Ed visits RR [95% CI] |                          |
|---------------------|---------------|------------------------------|--------------------------|-----------------------|--------------------------|
|                     |               | Unadjusted                   | Adjusted                 | Unadjusted            | Adjusted                 |
| Moderate/late PTB   | Asthma        | 1.78 [1.55, 2.05]            | <b>1.78</b> [1.53, 2.08] | 1.48 [1.38, 1.60]     | <b>1.53</b> [1.42, 1.66] |
|                     | Bronchiolitis | 2.18 [1.98, 2.40]            | <b>2.17</b> [1.96, 2.40] | 1.71 [1.60, 1.82]     | <b>1.67</b> [1.56, 1.80] |
|                     | Bronchitis    | 1.79 [1.25, 2.57]            | <b>1.88</b> [1.28, 2.78] | 1.18 [1.09, 1.26]     | <b>1.20</b> [1.11, 1.30] |
|                     | Croup         | 1.41 [1.13, 1.76]            | <b>1.52</b> [1.20, 1.92] | 1.21 [1.14, 1.29]     | <b>1.25</b> [1.17, 1.33] |
|                     | Influenza     | 1.87 [1.37, 2.55]            | <b>1.81</b> [1.29, 2.54] | 1.26 [1.12, 1.41]     | <b>1.31</b> [1.15, 1.49] |
|                     | Other LRTIs   | 2.33 [1.73, 3.14]            | <b>2.41</b> [1.77, 3.28] | 1.36 [1.20, 1.54]     | <b>1.35</b> [1.19, 1.55] |
|                     | Other URTIs   | 1.83 [1.57, 2.14]            | <b>1.88</b> [1.60, 2.22] | 1.12 [1.08, 1.16]     | <b>1.15</b> [1.10, 1.19] |
|                     | Pneumonia     | 1.70 [1.52, 1.90]            | <b>1.69</b> [1.50, 1.89] | 1.43 [1.35, 1.52]     | <b>1.50</b> [1.41, 1.60] |
| Very PTB            | Asthma        | 4.29 [3.25, 5.68]            | <b>3.98</b> [2.73, 5.81] | 2.26 [1.96, 2.60]     | <b>2.43</b> [2.01, 2.93] |
|                     | Bronchiolitis | 4.25 [3.51, 5.14]            | <b>3.59</b> [2.89, 4.47] | 2.17 [1.89, 2.49]     | <b>2.20</b> [1.86, 2.61] |
|                     | Bronchitis    | 2.45 [1.22, 4.90]            | <b>3.83</b> [1.62, 9.09] | 1.38 [1.14, 1.66]     | <b>1.35</b> [1.05, 1.73] |
|                     | Croup         | 3.48 [2.08, 5.83]            | <b>3.26</b> [1.94, 5.48] | 1.23 [1.06, 1.42]     | <b>1.24</b> [1.04, 1.48] |
|                     | Influenza     | 6.12 [4.22, 8.89]            | <b>2.33</b> [1.30, 4.18] | 0.94 [0.75, 1.18]     | 0.89 [0.67, 1.20]        |
|                     | Other LRTIs   | 8.91 [6.33, 12.54]           | <b>4.81</b> [2.90, 7.97] | 1.26 [0.94, 1.70]     | 1.08 [0.77, 1.52]        |
|                     | Other URTIs   | 3.42 [2.73, 4.28]            | <b>2.69</b> [1.91, 3.78] | 0.97 [0.88, 1.06]     | 0.98 [0.88, 1.10]        |
|                     | Pneumonia     | 4.17 [3.31, 5.24]            | <b>3.33</b> [2.54, 4.38] | 2.42 [2.13, 2.75]     | <b>2.26</b> [1.90, 2.69] |
| SGA at term         | Asthma        | 1.09 [0.93, 1.31]            | 1.10 [0.92, 1.31]        | 1.06 [0.97, 1.16]     | 1.05 [0.96, 1.15]        |
|                     | Bronchiolitis | 1.14 [1.02, 1.28]            | <b>1.13</b> [1.01, 1.27] | 1.05 [0.97, 1.13]     | 1.04 [0.97, 1.12]        |
|                     | Bronchitis    | 1.34 [0.87, 2.09]            | 1.33 [0.86, 2.07]        | 0.97 [0.89, 1.06]     | 0.98 [0.89, 1.06]        |
|                     | Croup         | 0.85 [0.63, 1.14]            | 0.85 [0.63, 1.15]        | 0.87 [0.82, 0.92]     | <b>0.86</b> [0.82, 0.92] |
|                     | Influenza     | 1.35 [0.97, 1.88]            | 1.33 [0.95, 1.86]        | 1.00 [0.92, 1.10]     | 1.00 [0.91, 1.09]        |
|                     | Other LRTIs   | 1.27 [0.86, 1.89]            | 1.24 [0.83, 1.83]        | 1.16 [1.02, 1.33]     | <b>1.16</b> [1.01, 1.32] |
|                     | Other URTIs   | 1.26 [1.06, 1.50]            | <b>1.25</b> [1.05, 1.49] | 1.03 [0.99, 1.06]     | 1.02 [0.99, 1.06]        |
|                     | Pneumonia     | 1.09 [0.95, 1.26]            | 1.09 [0.94, 1.25]        | 1.03 [0.95, 1.10]     | 1.02 [0.95, 1.10]        |
| LGA at term         | Asthma        | 0.91 [0.78, 1.05]            | 0.92 [0.78, 1.08]        | 1.00 [0.92, 1.09]     | 1.00 [0.93, 1.09]        |
|                     | Bronchiolitis | 1.14 [1.03, 1.27]            | <b>1.14</b> [1.02, 1.26] | 1.03 [0.96, 1.10]     | 1.03 [0.96, 1.11]        |
|                     | Bronchitis    | 1.86 [1.34, 2.57]            | <b>1.86</b> [1.35, 2.57] | 0.97 [0.90, 1.04]     | 0.98 [0.91, 1.05]        |
|                     | Croup         | 1.24 [0.98, 1.57]            | 1.24 [0.99, 1.57]        | 1.17 [1.11, 1.24]     | <b>1.17</b> [1.11, 1.24] |
|                     | Influenza     | 1.22 [0.85, 1.73]            | 1.22 [0.85, 1.74]        | 0.98 [0.89, 1.08]     | 0.98 [0.89, 1.09]        |
|                     | Other LRTIs   | 1.16 [0.83, 1.62]            | 1.15 [0.82, 1.61]        | 1.01 [0.91, 1.12]     | 1.01 [0.91, 1.11]        |
|                     | Other URTIs   | 0.86 [0.73, 1.02]            | 0.86 [0.72, 1.02]        | 1.03 [1.01, 1.04]     | <b>1.03</b> [1.01, 1.04] |
|                     | Pneumonia     | 0.96 [0.85, 1.08]            | 0.95 [0.84, 1.07]        | 0.99 [0.93, 1.05]     | 0.99 [0.93, 1.05]        |

CI = confidence interval; LGA = large for gestational age; LRTIs = lower respiratory tract infections; URTIs = upper respiratory tract infections; PTB= preterm birth; RR = rate ratios; SGA = small for gestational age.

RR adjusted by sex, 5, minute Apgar score, bronchopulmonary dysplasia, use of significant resuscitation methods, and material and social deprivation. Reference group = appropriate-for-gestational age infants born at term.
