# Supplementary material for: Patterns of respiratory health services utilization from birth to 5 years of children who experienced adverse birth outcomes
Source: PubMed Central journal article supplement (PMC7895380; doi:10.1371/journal.pone.0247527), 2021-02-19
Supplement: pone.0247527.s005.pdf [file pone.0247527.s005.pdf]

**S1 Appendix.** Age-specific trajectories of respiratory health services utilization for single respiratory conditions by birth groups.

**Table A.** Age-specific trajectories of health service utilization due to asthma by birth groups.

| <b>Asthma</b>      |                    |                                           |               |
|--------------------|--------------------|-------------------------------------------|---------------|
| <b>Age (years)</b> | <b>Birth group</b> | <b>Predicted rate (per 1000 per year)</b> | <b>95% CI</b> |
| 0 to <1            | Reference group    | 14.8                                      | [14.2, 15.4]  |
|                    | Moderate/late PTB  | 25.8                                      | [23.0, 28.6]  |
|                    | Very PTB           | 40.5                                      | [32.0, 48.9]  |
|                    | SGA at term        | 16.5                                      | [14.6, 18.5]  |
|                    | LGA at term        | 17.5                                      | [15.6, 19.5]  |
| 1 to <2            | Reference group    | 27.6                                      | [26.7, 28.4]  |
|                    | Moderate/late PTB  | 49.0                                      | [45.1, 52.9]  |
|                    | Very PTB           | 93.8                                      | [80.6, 107.0] |
|                    | SGA at term        | 29.1                                      | [26.5, 31.8]  |
|                    | LGA at term        | 28.9                                      | [26.4, 31.4]  |
| 2 to <3            | Reference group    | 25.5                                      | [24.7, 26.3]  |
|                    | Moderate/late PTB  | 36.7                                      | [33.3, 40.0]  |
|                    | Very PTB           | 77.8                                      | [65.9, 89.7]  |
|                    | SGA at term        | 26.5                                      | [24.0, 29.0]  |
|                    | LGA at term        | 22.9                                      | [20.7, 25.1]  |
| 3 to <4            | Reference group    | 21.7                                      | [21.0, 22.5]  |
|                    | Moderate/late PTB  | 35.5                                      | [32.2, 38.8]  |
|                    | Very PTB           | 48.5                                      | [39.2, 57.8]  |
|                    | SGA at term        | 22.6                                      | [20.3, 24.9]  |
|                    | LGA at term        | 22.3                                      | [20.1, 24.5]  |
| 4 to <5            | Reference group    | 18.4                                      | [17.7, 19.1]  |
|                    | Moderate/late PTB  | 28.8                                      | [25.8, 31.7]  |
|                    | Very PTB           | 46.2                                      | [37.2, 55.3]  |
|                    | SGA at term        | 18.3                                      | [16.2, 20.4]  |
|                    | LGA at term        | 17.1                                      | [15.2, 19.0]  |
| 5 to <6            | Reference group    | 14.6                                      | [14.0, 15.3]  |
|                    | Moderate/late PTB  | 22.8                                      | [20.2, 25.5]  |
|                    | Very PTB           | 30.7                                      | [23.3, 38.0]  |
|                    | SGA at term        | 16.6                                      | [14.6, 18.6]  |
|                    | LGA at term        | 16.6                                      | [14.7, 18.5]  |

Predicted rates expressed as aggregated ED visits and hospitalizations per 1,000 singleton live births per year, adjusted by sex, 5, minute Apgar score, bronchopulmonary dysplasia, use of significant resuscitation methods, and material and social deprivation.

CI = Confidence intervals; LGA=large for gestational age; PTB=preterm birth; SGA=small for gestational age. Reference group = appropriate-for-gestational age infants born at term.

**Table B.** Age-specific trajectories of health service utilization due to bronchiolitis by birth groups.

| <b>Bronchiolitis</b> |                    |                                               |                 |
|----------------------|--------------------|-----------------------------------------------|-----------------|
| <b>Age (years)</b>   | <b>Birth group</b> | <b>Predicted rate<br/>(per 1000 per year)</b> | <b>95% CI</b>   |
| 0 to <1              | Reference group    | 71.0                                          | [69.6, 72.3]    |
|                      | Moderate/late PTB  | 138.1                                         | [[131.6, 144.6] |
|                      | Very PTB           | 175.7                                         | [157.1, 194.3]  |
|                      | SGA at term        | 73.4                                          | [69.2, 77.5]    |
|                      | LGA at term        | 83.8                                          | [79.6, 88.1]    |
| 1 to <2              | Reference group    | 24.4                                          | [23.6, 25.2]    |
|                      | Moderate/late PTB  | 40.2                                          | [36.7, 43.7]    |
|                      | Very PTB           | 76.9                                          | [65.2, 88.6]    |
|                      | SGA at term        | 23.9                                          | [21.5, 26.2]    |
|                      | LGA at term        | 28.0                                          | [25.5, 30.4]    |
| 2 to <3              | Reference group    | 7.5                                           | [7.1, 8.0]      |
|                      | Moderate/late PTB  | 11.8                                          | [9.9, 13.7]     |
|                      | Very PTB           | 21.5                                          | [15.5, 27.5]    |
|                      | SGA at term        | 5.7                                           | [4.5, 6.8]      |
|                      | LGA at term        | 7.7                                           | [6.4, 9.0]      |
| 3 to <4              | Reference group    | 3.1                                           | [2.8, 3.4]      |
|                      | Moderate/late PTB  | 6.3                                           | [4.9, 7.7]      |
|                      | Very PTB           | 13.7                                          | [8.9, 18.5]     |
|                      | SGA at term        | 3.7                                           | [2.8, 4.7]      |
|                      | LGA at term        | 4.5                                           | [3.6, 5.5]      |
| 4 to <5              | Reference group    | 2.0                                           | [1.7, 2.2]      |
|                      | Moderate/late PTB  | 2.7                                           | [1.8, 3.6]      |
|                      | Very PTB           | 3.4                                           | [1.1, 5.8]      |
|                      | SGA at term        | 1.8                                           | [1.1, 2.4]      |
|                      | LGA at term        | 1.9                                           | [1.2, 2.5]      |
| 5 to <6              | Reference group    | 1.3                                           | [1.1, 1.5]      |
|                      | Moderate/late PTB  | 1.4                                           | [0.8, 2.1]      |
|                      | Very PTB           | 3.0                                           | [0.8, 5.2]      |
|                      | SGA at term        | 1.2                                           | [0.7, 1.8]      |
|                      | LGA at term        | 0.9                                           | [0.5, 1.3]      |

Predicted rates expressed as aggregated ED visits and hospitalizations per 1,000 singleton live births per year, adjusted by sex, 5, minute Apgar score, bronchopulmonary dysplasia, use of significant resuscitation methods, and material and social deprivation.

CI = Confidence intervals; LGA=large for gestational age; PTB=preterm birth; SGA=small for gestational age. Reference group = appropriate-for-gestational age infants born at term.

**Table C.** Age-specific trajectories of health service utilization due to bronchitis by birth groups.

| <b>Bronchitis</b>  |                    |                                               |               |
|--------------------|--------------------|-----------------------------------------------|---------------|
| <b>Age (years)</b> | <b>Birth group</b> | <b>Predicted rate<br/>(per 1000 per year)</b> | <b>95% CI</b> |
| 0 to <1            | Reference group    | 17.2                                          | [16.5, 17.8]  |
|                    | Moderate/late PTB  | 21.1                                          | [18.6, 23.7]  |
|                    | Very PTB           | 18.3                                          | [12.7, 23.9]  |
|                    | SGA at term        | 14.2                                          | [12.4, 16.1]  |
|                    | LGA at term        | 22.2                                          | [20.0, 24.3]  |
| 1 to <2            | Reference group    | 17.8                                          | [17.1, 18.5]  |
|                    | Moderate/late PTB  | 21.8                                          | [19.2, 24.4]  |
|                    | Very PTB           | 31.8                                          | [24.3, 39.3]  |
|                    | SGA at term        | 15.3                                          | [13.4, 17.2]  |
|                    | LGA at term        | 19.6                                          | [17.5, 21.6]  |
| 2 to <3            | Reference group    | 11.3                                          | [10.8, 11.9]  |
|                    | Moderate/late PTB  | 13.3                                          | [11.3, 15.4]  |
|                    | Very PTB           | 19.2                                          | [13.4, 24.9]  |
|                    | SGA at term        | 9.0                                           | [7.6, 10.4]   |
|                    | LGA at term        | 14.0                                          | [12.3, 15.8]  |
| 3 to <4            | Reference group    | 9.4                                           | [8.9, 9.9]    |
|                    | Moderate/late PTB  | 11.6                                          | [9.7, 13.5]   |
|                    | Very PTB           | 12.2                                          | [7.6, 16.8]   |
|                    | SGA at term        | 8.1                                           | [6.8, 9.5]    |
|                    | LGA at term        | 10.8                                          | [9.3, 12.4]   |
| 4 to <5            | Reference group    | 7.4                                           | [7.0, 7.9]    |
|                    | Moderate/late PTB  | 9.0                                           | [7.3, 10.6]   |
|                    | Very PTB           | 10.9                                          | [6.6, 15.2]   |
|                    | SGA at term        | 5.5                                           | [4.4, 6.6]    |
|                    | LGA at term        | 8.4                                           | [7.0, 9.7]    |
| 5 to <6            | Reference group    | 5.5                                           | [5.1, 5.9]    |
|                    | Moderate/late PTB  | 6.9                                           | [5.5, 8.4]    |
|                    | Very PTB           | 7.0                                           | [3.5, 10.4]   |
|                    | SGA at term        | 4.7                                           | [3.7, 5.8]    |
|                    | LGA at term        | 7.1                                           | [5.9, 8.4]    |

Predicted rates expressed as aggregated ED visits and hospitalizations per 1,000 singleton live births per year, adjusted by sex, 5, minute Apgar score, bronchopulmonary dysplasia, use of significant resuscitation methods, and material and social deprivation.

CI = Confidence intervals; LGA=large for gestational age; PTB=preterm birth; SGA=small for gestational age. Reference group = appropriate-for-gestational age infants born at term.

**Table D.** Age-specific trajectories of health service utilization due to croup by birth groups.

| <b>Croup</b>       |                    |                                           |               |
|--------------------|--------------------|-------------------------------------------|---------------|
| <b>Age (years)</b> | <b>Birth group</b> | <b>Predicted rate (per 1000 per year)</b> | <b>95% CI</b> |
| 0 to <1            | Reference group    | 28.3                                      | [27.4, 29.1]  |
|                    | Moderate/late PTB  | 35.2                                      | [31.9, 38.5]  |
|                    | Very PTB           | 35.6                                      | [27.6, 43.7]  |
|                    | SGA at term        | 23.0                                      | [20.7, 25.2]  |
|                    | LGA at term        | 31.8                                      | [29.2, 34.4]  |
| 1 to <2            | Reference group    | 48.0                                      | [46.9, 49.1]  |
|                    | Moderate/late PTB  | 57.7                                      | [53.5, 61.9]  |
|                    | Very PTB           | 62.1                                      | [51.4, 72.8]  |
|                    | SGA at term        | 42.5                                      | [39.3, 45.7]  |
|                    | LGA at term        | 59.4                                      | [55.8, 62.9]  |
| 2 to <3            | Reference group    | 34.0                                      | [33.1, 35.0]  |
|                    | Moderate/late PTB  | 39.7                                      | [36.2, 43.2]  |
|                    | Very PTB           | 44.8                                      | [35.7, 53.8]  |
|                    | SGA at term        | 26.7                                      | [24.2, 29.2]  |
|                    | LGA at term        | 39.4                                      | [36.5, 42.3]  |
| 3 to <4            | Reference group    | 24.0                                      | [23.2, 24.7]  |
|                    | Moderate/late PTB  | 30.1                                      | [27.0, 33.1]  |
|                    | Very PTB           | 24.2                                      | [17.6, 30.8]  |
|                    | SGA at term        | 19.9                                      | [17.7, 22.1]  |
|                    | LGA at term        | 30.8                                      | [28.3, 33.4]  |
| 4 to <5            | Reference group    | 17.7                                      | [17.0, 18.4]  |
|                    | Moderate/late PTB  | 24.3                                      | [21.5, 27.0]  |
|                    | Very PTB           | 25.1                                      | [18.4, 31.8]  |
|                    | SGA at term        | 13.6                                      | [11.8, 15.4]  |
|                    | LGA at term        | 21.6                                      | [19.5, 23.8]  |
| 5 to <6            | Reference group    | 11.5                                      | [11.0, 12.1]  |
|                    | Moderate/late PTB  | 15.3                                      | [13.2, 17.5]  |
|                    | Very PTB           | 16.4                                      | [11.0, 21.9]  |
|                    | SGA at term        | 11.6                                      | [10.0, 13.3]  |
|                    | LGA at term        | 13.2                                      | [11.5, 14.9]  |

Predicted rates expressed as aggregated ED visits and hospitalizations per 1,000 singleton live births per year, adjusted by sex, 5 minute Apgar score, bronchopulmonary dysplasia, use of significant resuscitation methods, and material and social deprivation.

CI = Confidence intervals; LGA=large for gestational age; PTB=preterm birth; SGA=small for gestational age. Reference group = appropriate-for-gestational age infants born at term.

**Table E.** Age-specific trajectories of health service utilization due to influenza by birth groups.

| <b>Influenza</b>   |                    |                                           |               |
|--------------------|--------------------|-------------------------------------------|---------------|
| <b>Age (years)</b> | <b>Birth group</b> | <b>Predicted rate (per 1000 per year)</b> | <b>95% CI</b> |
| 0 to <1            | Reference group    | 6.7                                       | [6.3, 7.2]    |
|                    | Moderate/late PTB  | 13.5                                      | [11.4, 15.5]  |
|                    | Very PTB           | 9.0                                       | [5.2, 12.8]   |
|                    | SGA at term        | 6.2                                       | [5.0, 7.5]    |
|                    | LGA at term        | 8.4                                       | [7.0, 9.7]    |
| 1 to <2            | Reference group    | 7.8                                       | [7.3, 8.2]    |
|                    | Moderate/late PTB  | 9.4                                       | [7.7, 11.1]   |
|                    | Very PTB           | 7.8                                       | [4.3, 11.4]   |
|                    | SGA at term        | 7.8                                       | [6.5, 9.2]    |
|                    | LGA at term        | 8.7                                       | [7.4, 10.1]   |
| 2 to <3            | Reference group    | 6.0                                       | [5.6, 6.4]    |
|                    | Moderate/late PTB  | 6.9                                       | [5.4, 8.4]    |
|                    | Very PTB           | 7.8                                       | [4.3, 11.4]   |
|                    | SGA at term        | 6.3                                       | [5.1, 7.5]    |
|                    | LGA at term        | 6.3                                       | [5.1, 7.4]    |
| 3 to <4            | Reference group    | 6.0                                       | [5.6, 6.4]    |
|                    | Moderate/late PTB  | 7.7                                       | [6.2, 9.2]    |
|                    | Very PTB           | 5.9                                       | [2.8, 8.9]    |
|                    | SGA at term        | 6.1                                       | [4.9, 7.3]    |
|                    | LGA at term        | 5.3                                       | [4.2, 6.3]    |
| 4 to <5            | Reference group    | 5.2                                       | [4.8, 5.5]    |
|                    | Moderate/late PTB  | 5.9                                       | [4.6, 7.3]    |
|                    | Very PTB           | 4.3                                       | [1.7, 6.9]    |
|                    | SGA at term        | 4.4                                       | [3.4, 5.4]    |
|                    | LGA at term        | 5.0                                       | [3.9, 6.0]    |
| 5 to <6            | Reference group    | 3.4                                       | [3.1, 3.7]    |
|                    | Moderate/late PTB  | 3.4                                       | [2.4, 4.4]    |
|                    | Very PTB           | 2.7                                       | [0.7, 4.8]    |
|                    | SGA at term        | 3.1                                       | [2.2, 3.9]    |
|                    | LGA at term        | 3.9                                       | [2.9, 4.8]    |

Predicted rates expressed as aggregated ED visits and hospitalizations per 1,000 singleton live births per year, adjusted by sex, 5, minute Apgar score, bronchopulmonary dysplasia, use of significant resuscitation methods, and material and social deprivation.

CI = Confidence intervals; LGA=large for gestational age; PTB=preterm birth; SGA=small for gestational age. Reference group = appropriate-for-gestational age infants born at term.

**Table F.** Age-specific trajectories of health service utilization due to other lower respiratory tract infections by birth groups.

| <b>Other lower respiratory tract infections</b> |                    |                                           |               |
|-------------------------------------------------|--------------------|-------------------------------------------|---------------|
| <b>Age (years)</b>                              | <b>Birth group</b> | <b>Predicted rate (per 1000 per year)</b> | <b>95% CI</b> |
| 0 to <1                                         | Reference group    | 5.3                                       | [4.9, 5.7]    |
|                                                 | Moderate/late PTB  | 9.0                                       | [7.3, 10.6]   |
|                                                 | Very PTB           | 9.4                                       | [5.7, 13.0]   |
|                                                 | SGA at term        | 5.7                                       | [4.5, 6.8]    |
|                                                 | LGA at term        | 7.4                                       | [6.1, 8.6]    |
| 1 to <2                                         | Reference group    | 5.8                                       | [5.4, 6.2]    |
|                                                 | Moderate/late PTB  | 9.7                                       | [8.0, 11.4]   |
|                                                 | Very PTB           | 8.0                                       | [4.6, 11.4]   |
|                                                 | SGA at term        | 6.3                                       | [5.1, 7.5]    |
|                                                 | LGA at term        | 7.0                                       | [5.8, 8.3]    |
| 2 to <3                                         | Reference group    | 4.1                                       | [3.8, 4.4]    |
|                                                 | Moderate/late PTB  | 5.4                                       | [4.1, 6.7]    |
|                                                 | Very PTB           | 8.0                                       | [4.6, 11.4]   |
|                                                 | SGA at term        | 4.6                                       | [3.5, 5.6]    |
|                                                 | LGA at term        | 4.3                                       | [3.4, 5.3]    |
| 3 to <4                                         | Reference group    | 3.2                                       | [2.9, 3.5]    |
|                                                 | Moderate/late PTB  | 4.0                                       | [2.9, 5.1]    |
|                                                 | Very PTB           | 4.5                                       | [2.0, 7.0]    |
|                                                 | SGA at term        | 3.2                                       | [2.4, 4.1]    |
|                                                 | LGA at term        | 3.5                                       | [2.6, 4.4]    |
| 4 to <5                                         | Reference group    | 2.8                                       | [2.5, 3.1]    |
|                                                 | Moderate/late PTB  | 3.8                                       | [2.7, 4.8]    |
|                                                 | Very PTB           | 4.5                                       | [2.0, 7.0]    |
|                                                 | SGA at term        | 3.3                                       | [2.4, 4.2]    |
|                                                 | LGA at term        | 2.6                                       | [1.8, 3.3]    |
| 5 to <6                                         | Reference group    | 2.0                                       | [1.8, 2.2]    |
|                                                 | Moderate/late PTB  | 3.8                                       | [2.8, 4.9]    |
|                                                 | Very PTB           | 3.1                                       | [1.1, 5.2]    |
|                                                 | SGA at term        | 1.8                                       | [1.2, 2.5]    |
|                                                 | LGA at term        | 2.8                                       | [2.0, 3.5]    |

Predicted rates expressed as aggregated ED visits and hospitalizations per 1,000 singleton live births per year, adjusted by sex, 5, minute Apgar score, bronchopulmonary dysplasia, use of significant resuscitation methods, and material and social deprivation.

CI = Confidence intervals; LGA=large for gestational age; PTB=preterm birth; SGA=small for gestational age. Reference group = appropriate-for-gestational age infants born at term.

**Table G.** Age-specific trajectories of health service utilization due to pneumonia by birth groups.

| <b>Pneumonia</b>   |                    |                                           |               |
|--------------------|--------------------|-------------------------------------------|---------------|
| <b>Age (years)</b> | <b>Birth group</b> | <b>Predicted rate (per 1000 per year)</b> | <b>95% CI</b> |
| 0 to <1            | Reference group    | 30.4                                      | [29.5, 31.3]  |
|                    | Moderate/late PTB  | 54.1                                      | [50.0, 58.1]  |
|                    | Very PTB           | 86.7                                      | [74.6, 98.8]  |
|                    | SGA at term        | 29.9                                      | [27.2, 32.5]  |
|                    | LGA at term        | 36.2                                      | [33.5, 39.0]  |
| 1 to <2            | Reference group    | 36.7                                      | [35.8, 37.7]  |
|                    | Moderate/late PTB  | 55.1                                      | [51.0, 59.2]  |
|                    | Very PTB           | 105.2                                     | [91.7, 118.6] |
|                    | SGA at term        | 34.8                                      | [31.9, 37.6]  |
|                    | LGA at term        | 41.2                                      | [38.2, 44.2]  |
| 2 to <3            | Reference group    | 21.8                                      | [21.1, 22.6]  |
|                    | Moderate/late PTB  | 36.2                                      | [32.8, 39.5]  |
|                    | Very PTB           | 71.0                                      | [60.2, 81.9]  |
|                    | SGA at term        | 20.4                                      | [18.2, 22.6]  |
|                    | LGA at term        | 21.8                                      | [19.6, 24.0]  |
| 3 to <4            | Reference group    | 15.7                                      | [15.1, 16.4]  |
|                    | Moderate/late PTB  | 25.8                                      | [23.0, 28.6]  |
|                    | Very PTB           | 34.5                                      | [27.1, 41.9]  |
|                    | SGA at term        | 15.3                                      | [13.4, 17.2]  |
|                    | LGA at term        | 16.7                                      | [14.8, 18.6]  |
| 4 to <5            | Reference group    | 11.3                                      | [10.7, 11.8]  |
|                    | Moderate/late PTB  | 18.6                                      | [16.2, 20.9]  |
|                    | Very PTB           | 35.3                                      | [27.8, 42.8]  |
|                    | SGA at term        | 11.6                                      | [9.9, 13.2]   |
|                    | LGA at term        | 10.5                                      | [9.0, 12.0]   |
| 5 to <6            | Reference group    | 8.1                                       | [7.6, 8.5]    |
|                    | Moderate/late PTB  | 12.8                                      | [10.8, 14.8]  |
|                    | Very PTB           | 20.1                                      | [14.4, 25.7]  |
|                    | SGA at term        | 9.4                                       | [7.9, 10.9]   |
|                    | LGA at term        | 9.2                                       | [7.8, 10.6]   |

Predicted rates expressed as aggregated ED visits and hospitalizations per 1,000 singleton live births per year, adjusted by sex, 5, minute Apgar score, bronchopulmonary dysplasia, use of significant resuscitation methods, and material and social deprivation.

CI = Confidence intervals; LGA=large for gestational age; PTB=preterm birth; SGA=small for gestational age. Reference group = appropriate-for-gestational age infants born at term.

**Table H.** Age-specific trajectories of health service utilization due to other upper respiratory tract infections by birth groups.

| <b>Other upper respiratory tract infections</b> |                    |                                           |                |
|-------------------------------------------------|--------------------|-------------------------------------------|----------------|
| <b>Age (years)</b>                              | <b>Birth group</b> | <b>Predicted rate (per 1000 per year)</b> | <b>95% CI</b>  |
| 0 to <1                                         | Reference group    | 194.5                                     | [192.2, 196.7] |
|                                                 | Moderate/late PTB  | 236.2                                     | [227.6, 244.7] |
|                                                 | Very PTB           | 180.8                                     | [162.7, 199.0] |
|                                                 | SGA at term        | 185.9                                     | [179.3, 192.5] |
|                                                 | LGA at term        | 223.7                                     | [216.8, 230.7] |
| 1 to <2                                         | Reference group    | 175.3                                     | [173.2, 177.4] |
|                                                 | Moderate/late PTB  | 208.2                                     | [200.2, 216.3] |
|                                                 | Very PTB           | 196.7                                     | [177.8, 215.7] |
|                                                 | SGA at term        | 164.2                                     | [158.1, 170.4] |
|                                                 | LGA at term        | 200.1                                     | [193.6, 206.7] |
| 2 to <3                                         | Reference group    | 116.9                                     | [115.2, 118.7] |
|                                                 | Moderate/late PTB  | 136.0                                     | [129.5, 142.4] |
|                                                 | Very PTB           | 125.9                                     | [110.8, 140.9] |
|                                                 | SGA at term        | 110.9                                     | [105.8, 116.0] |
|                                                 | LGA at term        | 133.9                                     | [128.6, 139.3] |
| 3 to <4                                         | Reference group    | 98.1                                      | [96.5, 99.7]   |
|                                                 | Moderate/late PTB  | 113.3                                     | [107.4, 119.2] |
|                                                 | Very PTB           | 103.6                                     | [90.0, 117.2]  |
|                                                 | SGA at term        | 89.1                                      | [84.5, 93.7]   |
|                                                 | LGA at term        | 111.8                                     | [106.9, 116.7] |
| 4 to <5                                         | Reference group    | 82.5                                      | [81.0, 84.0]   |
|                                                 | Moderate/late PTB  | 92.8                                      | [87.5, 98.2]   |
|                                                 | Very PTB           | 99.5                                      | [86.2, 112.8]  |
|                                                 | SGA at term        | 78.2                                      | [73.9, 82.5]   |
|                                                 | LGA at term        | 90.8                                      | [86.4, 95.2]   |
| 5 to <6                                         | Reference group    | 68.5                                      | [67.1, 69.8]   |
|                                                 | Moderate/late PTB  | 76.4                                      | [71.6, 81.3]   |
|                                                 | Very PTB           | 74.1                                      | [62.6, 85.5]   |
|                                                 | SGA at term        | 62.2                                      | [58.4, 66.1]   |
|                                                 | LGA at term        | 79.2                                      | [75.1, 83.3]   |

Predicted rates expressed as aggregated ED visits and hospitalizations per 1,000 singleton live births per year, adjusted by sex, 5, minute Apgar score, bronchopulmonary dysplasia, use of significant resuscitation methods, and material and social deprivation.

CI = Confidence intervals; LGA=large for gestational age; PTB=preterm birth; SGA=small for gestational age. Reference group = appropriate-for-gestational age infants born at term.
